# Supplementary material for: Abrogating Cbl-b in effector CD8+ T cells improves the efficacy of adoptive therapy of leukemia in mice
Source: JCI journal article supplement (doi:10.1172/jci41991), 2010-09-30
Supplement: sd1 [file 1]

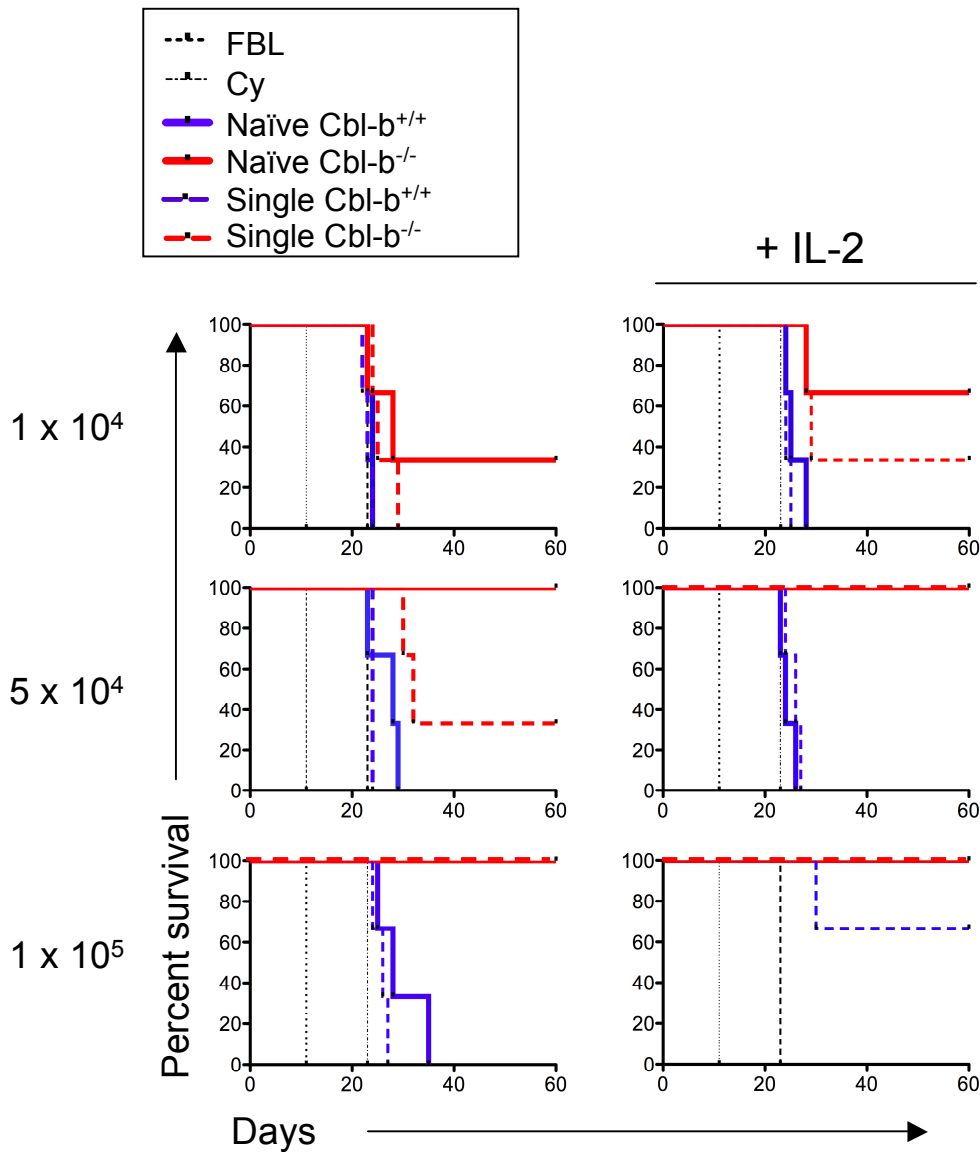

**Supplementary Figure 1.** The efficacy of naïve or minimally expanded (one cycle of stimulation in vitro with antigen and IL-2) TCR<sub>gag</sub> and TCR<sub>gag</sub>Cbl-b<sup>-/-</sup> cells during adoptive immunotherapy of disseminated leukemia. Titration numbers ( $1 \times 10^4$ ,  $5 \times 10^4$  or  $1 \times 10^5$ ) of naïve TCR<sub>gag</sub>Cbl-b<sup>+/+</sup> and Cbl-b<sup>-/-</sup> cells activated a single time in vitro (single stim) were transferred into mice bearing disseminated leukemia that received cyclophosphamide (Cy) 6 h prior to T cell transfer. Some mice (right panel) also received exogenous IL-2 (r-h-IL-2,  $10^4$  U/mouse for 10 d). Mice were monitored daily for tumor formation and survival.

## Supplementary Figure 1
